# Supplementary material for: On the population of triplet states of 2-seleno-thymine
Source: Royal Society of Chemistry journal article supplement (doi:10.1039/d1cp00041a), 2021-01-01
Supplement: d1cp00041a1.pdf [file d1cp00041a1.pdf]

# Supporting Information

## On the Population of Triplet States of 2-Seleno-Thymine

Danillo Valverde,<sup>†</sup> Sebastian Mai,<sup>\* ,‡</sup> Adalberto Vasconcelos Sanches de Araújo,<sup>§</sup> Sylvio Canuto,<sup>†</sup> Leticia González, Antonio Carlos Borin<sup>\*,§</sup>

<sup>†</sup> *Institute of Physics, University of São Paulo, São Paulo, SP, 05508-090, Brazil*

<sup>‡</sup> *Photonics Institute, Vienna University of Technology, Vienna, Austria*

*Institute of Theoretical Chemistry, Faculty of Chemistry, University of Vienna, Vienna, Austria*

*Email: [sebastian.mai@univie.ac.at](mailto:sebastian.mai@univie.ac.at)*

<sup>§</sup> *Department of Fundamental Chemistry, Institute of Chemistry, University of São Paulo*

*Avenida Professor Lineu Prestes, 748, São Paulo, SP, CEP 05508-000, Brazil*

*Email: [ancborin@iq.usp.br](mailto:ancborin@iq.usp.br)*

### Table of Contents

|                                                                         |   |
|-------------------------------------------------------------------------|---|
| I. Spin-orbit Couplings .....                                           | 2 |
| II. Comparison among different active spaces and atomic basis set ..... | 2 |
| III. Optimized Geometries .....                                         | 3 |

## I. Spin-orbit Couplings

Spin-orbit couplings were performed at the MS-CASPT2 within the atomic mean-field (AMFI) approximation. The effective spin-orbit couplings reported in the main text are given by:

$$\langle \Psi_S | H_{eff}^{SO} | \Psi_T \rangle = \sqrt{\frac{1}{3} \sum_i \langle \Psi_S | H_i^{SO} | \Psi_T \rangle^2} \quad (i = x, y, z)$$

where,  $\Psi_S$  and  $\Psi_T$  are the perturbatively modified electronic wavefunctions of the corresponding singlet and triplet states and  $H_i^{SO}$ ,  $i = (x, y, z)$ , are the components of the spin-orbit operators.

## II. Comparison among different active spaces and atomic basis set

Table S1: Vertical excitations energies of 2SeThy in gas phase computed with the MS(4,3)-CASPT2(14,11) level using two different basis sets. The relativistic effects via Douglas-Kroll-Hess formalism were incorporated in the calculation with the ANO-RCC-VDZP basis set. These calculations were performed in the ground-state optimized structure at the MP2/ANO-RCC-VDZP level.

| Nature                                                   | cc-pVDZ    |           | ANO-RCC-VDZP |           |
|----------------------------------------------------------|------------|-----------|--------------|-----------|
|                                                          | $\Delta E$ | Osc. Str. | $\Delta E$   | Osc. Str. |
| S1 1( $n\text{Se}\pi 5^*$ )                              | 3.48       | 0.000     | 3.44         | 0.000     |
| S2 1( $\pi\text{Se}\pi 5^*$ )/1( $\pi\text{Se}\pi 6^*$ ) | 3.96       | 0.549     | 3.94         | 0.544     |
| S3 1( $\pi\text{Se}\pi 6^*$ )                            | 4.29       | 0.161     | 4.28         | 0.156     |
| T1 3( $\pi\text{Se}\pi 5^*$ )/3( $\pi\text{Se}\pi 6^*$ ) | 2.97       | —         | 2.97         | —         |
| T2 3( $n\text{Se}\pi 5^*$ )                              | 3.44       | —         | 3.43         | —         |
| T3 3( $\pi\text{Se}\pi 6^*$ )                            | 3.62       | —         | 3.64         | —         |

Table S2: Bond lengths (Å) for the ground state of 2SeThy in gas-phase computed at the MP2 level using two different basis set. The relativistic effects via Douglas-Kroll-Hess formalism were incorporated in the calculation with the ANO-RCC-VDZP basis set.

| Bond Length | cc-pVDZ | ANO-RCC-VDZP |
|-------------|---------|--------------|
| r(N1C2)     | 1.373   | 1.368        |
| r(C2N3)     | 1.373   | 1.369        |
| r(N3C4)     | 1.413   | 1.409        |
| r(C4C5)     | 1.468   | 1.459        |
| r(C5C6)     | 1.365   | 1.358        |
| r(N1C6)     | 1.380   | 1.378        |
| r(C2Se)     | 1.802   | 1.812        |
| r(C4O)      | 1.225   | 1.228        |

Table S3: Vertical excitation energies of 2SeThy in gas phase computed with the MS(4,3)-CASPT2/cc-pVDZ level using three different active space. These calculations were performed in the ground-state optimized structure obtained at the MS(4)-CASPT2(12,9)/cc-pVDZ level.

| Nature                                                | (5 $\pi$ , nSe, 3 $\pi^*$ ) |           | (5 $\pi$ , nSe, $\sigma$ , $\sigma^*$ , 3 $\pi^*$ ) |           | (5 $\pi$ , nSe, nO, $\sigma$ , $\sigma^*$ , 3 $\pi^*$ ) |           |
|-------------------------------------------------------|-----------------------------|-----------|-----------------------------------------------------|-----------|---------------------------------------------------------|-----------|
|                                                       | $\Delta E$                  | Osc. Str. | $\Delta E$                                          | Osc. Str. | $\Delta E$                                              | Osc. Str. |
| S1 1(nSe $\pi 5^*$ )                                  | 3.44                        | 0.000     | 3.44                                                | 0.000     | 3.32                                                    | 0.000     |
| S2<br>1( $\pi$ Se $\pi 5^*$ )/1( $\pi$ Se $\pi 6^*$ ) | 3.83                        | 0.564     | 3.87                                                | 0.582     | 3.79                                                    | 0.234     |
| S3 1( $\pi$ Se $\pi 6^*$ )                            | 4.30                        | 0.078     | 4.14                                                | 0.065     | 4.21                                                    | 0.238     |
| T1 3( $\pi$ Se $\pi 5^*$ )/3( $\pi$ Se $\pi 6^*$ )    | 2.99                        | —         | 3.02                                                | —         | 2.84                                                    | —         |
| T2 3(nSe $\pi 5^*$ )                                  | 3.02                        | —         | 3.49                                                | —         | 3.32                                                    | —         |
| T3 3( $\pi$ Se $\pi 6^*$ )                            | 3.62                        | —         | 3.67                                                | —         | 3.52                                                    | —         |

### III. Optimized

### Geometries

(Ångstrom)

15  
(S0)min

|    |             |             |             |
|----|-------------|-------------|-------------|
| C  | -1.17711378 | +0.86011068 | +0.00053813 |
| N  | +0.08620112 | +1.39862830 | +0.02680022 |
| C  | +1.24595970 | +0.64513216 | +0.01383940 |
| C  | +1.21975739 | -0.72221745 | +0.00389444 |
| C  | -0.08211507 | -1.39326435 | +0.01237425 |
| N  | -1.18762155 | -0.51075243 | +0.03375482 |
| C  | +2.44863066 | -1.58566069 | -0.01181058 |
| O  | -0.25987768 | -2.60558291 | -0.00150477 |
| Se | -2.68118967 | +1.88861138 | -0.06915882 |
| H  | +0.12459170 | +2.41429930 | -0.00033179 |
| H  | +2.17643494 | +1.21927073 | +0.00914255 |
| H  | -2.10759183 | -0.95363926 | +0.01516993 |
| H  | +2.45014127 | -2.23588418 | -0.90169273 |
| H  | +2.46265726 | -2.24925354 | +0.86815053 |
| H  | +3.36487057 | -0.97518273 | -0.01339659 |

15  
(S1)min

|    |             |             |             |
|----|-------------|-------------|-------------|
| C  | -1.19176884 | +0.89336104 | +0.24358017 |
| N  | +0.09560811 | +1.42728127 | +0.24267093 |
| C  | +1.23088775 | +0.66021808 | +0.11703288 |
| C  | +1.19238147 | -0.70343990 | -0.00160678 |
| C  | -0.11349266 | -1.37477124 | +0.08682847 |
| N  | -1.20312767 | -0.50687870 | +0.24235102 |
| C  | +2.41293425 | -1.56458165 | -0.15639075 |
| O  | -0.27783370 | -2.59125398 | +0.07242229 |
| Se | -2.50051445 | +1.67140110 | -1.03360562 |
| H  | +0.18555753 | +2.43665298 | +0.26951244 |
| H  | +2.17280689 | +1.21711480 | +0.12976917 |
| H  | -2.09847560 | -0.97588788 | +0.36878561 |
| H  | +2.48496513 | -2.29294428 | +0.66828173 |
| H  | +3.32961878 | -0.95379464 | -0.17287547 |
| H  | +2.36418804 | -2.14786200 | -1.09098714 |

15  
(S2)min boat

|    |             |             |             |
|----|-------------|-------------|-------------|
| C  | -1.13108985 | +0.89348078 | +0.08447154 |
| N  | +0.13927241 | +1.41009722 | +0.03739265 |
| C  | +1.28705960 | +0.64505424 | +0.03107102 |
| C  | +1.23862036 | -0.72314261 | +0.01710220 |
| C  | -0.07528281 | -1.37889634 | -0.00805223 |
| N  | -1.15990447 | -0.47843424 | +0.01229054 |
| C  | +2.45367906 | -1.60356307 | +0.00155133 |
| O  | -0.26198376 | -2.58917269 | -0.04155715 |
| Se | -2.34104072 | +1.79983231 | -1.39604370 |
| H  | +0.20234565 | +2.42408846 | -0.00191587 |
| H  | +2.22754424 | +1.20295164 | 0.04374580  |
| H  | -2.08374141 | -0.91195287 | -0.01056262 |
| H  | +2.45704079 | -2.23545548 | -0.90184270 |
| H  | +2.44543150 | -2.28690107 | 0.86675343  |
| H  | +3.37944955 | -1.00841696 | 0.02445184  |

15  
(S2)min pyramid

|    |             |             |             |
|----|-------------|-------------|-------------|
| C  | -1.13108985 | +0.89348078 | +0.08447154 |
| N  | +0.13927241 | +1.41009722 | +0.03739265 |
| C  | +1.28705960 | +0.64505424 | +0.03107102 |
| C  | +1.23862036 | -0.72314261 | +0.01710220 |
| C  | -0.07528281 | -1.37889634 | -0.00805223 |
| N  | -1.15990447 | -0.47843424 | +0.01229054 |
| C  | +2.45367906 | -1.60356307 | +0.00155133 |
| O  | -0.26198376 | -2.58917269 | -0.04155715 |
| Se | -2.34104072 | +1.79983231 | -1.39604370 |
| H  | +0.20234565 | +2.42408846 | -0.00191587 |
| H  | +2.22754424 | +1.20295164 | +0.04374580 |
| H  | -2.08374141 | -0.91195287 | -0.01056262 |
| H  | +2.45704079 | -2.23545548 | -0.90184270 |
| H  | +2.44543150 | -2.28690107 | +0.86675343 |
| H  | +3.37944955 | -1.00841696 | +0.02445184 |

15  
(T1)min

|    |             |             |             |
|----|-------------|-------------|-------------|
| C  | -1.30608013 | +0.83604045 | +0.34835704 |
| N  | +0.02619457 | +1.38431485 | +0.30976453 |
| C  | +1.17264912 | +0.65875338 | +0.10630608 |
| C  | +1.15939256 | -0.69228719 | -0.00028726 |
| C  | -0.13753571 | -1.40396877 | +0.13830287 |
| N  | -1.23559230 | -0.57553807 | +0.32644136 |
| C  | +2.39428849 | -1.52428513 | -0.19423614 |
| O  | -0.23901555 | -2.62811352 | +0.12689116 |
| Se | -1.92817824 | +1.82025560 | -1.33021815 |
| H  | +0.07383021 | +2.39433550 | +0.41557915 |
| H  | +2.10039977 | +1.24345116 | +0.04436284 |
| H  | -2.11725282 | -1.07437196 | +0.42755593 |
| H  | +2.33128177 | -2.10132560 | -1.12920825 |
| H  | +2.49810598 | -2.25536338 | +0.62127134 |
| H  | +3.29124733 | -0.88728234 | -0.22511351 |

15  
(T2)min

|    |             |             |             |
|----|-------------|-------------|-------------|
| C  | -1.19736100 | +0.87785663 | +0.26880995 |
| N  | +0.07963049 | +1.40901233 | +0.28579444 |
| C  | +1.22530907 | 0.65611309  | +0.13190136 |
| C  | +1.19365989 | -0.70468162 | +0.01327759 |
| C  | -0.10962103 | -1.37895779 | +0.11314948 |
| N  | -1.19679226 | -0.50666477 | +0.29728831 |
| C  | +2.41295920 | -1.56110245 | -0.17054088 |
| O  | -0.27750185 | -2.59330958 | +0.08106545 |
| Se | -2.44152232 | +1.70921010 | -1.16812012 |
| H  | +0.15821001 | +2.42031431 | +0.30237292 |
| H  | +2.16122326 | +1.22284981 | +0.12640616 |
| H  | -2.09846325 | -0.97650330 | +0.36499277 |
| H  | +2.35314883 | -2.12551401 | -1.11568690 |
| H  | +2.49200587 | -2.30442064 | +0.63965286 |
| H  | +3.32885013 | -0.94958712 | -0.18459441 |

15  
(S1/S2\_boat)CI

|    |             |             |             |
|----|-------------|-------------|-------------|
| C  | -1.09715606 | +0.81880221 | +0.00025916 |
| N  | +0.06998750 | +1.39029421 | -0.14909434 |
| C  | +1.28978892 | +0.64436578 | -0.25875800 |
| C  | +1.18611345 | -0.75893047 | -0.03389232 |
| C  | -0.04519493 | -1.40799651 | +0.09512821 |
| N  | -1.18170354 | -0.48020530 | +0.10890083 |
| C  | +2.44281740 | -1.58585047 | -0.01597845 |
| O  | -0.35893250 | -2.58343352 | +0.21764488 |
| Se | -2.69709016 | +1.87937488 | +0.04442344 |
| H  | +0.08305404 | +2.37783104 | -0.29811659 |
| H  | +2.16040981 | +1.20947620 | +0.04518654 |
| H  | -2.07566555 | -0.90513402 | +0.26189688 |
| H  | +2.21799346 | -2.59613517 | +0.31844530 |
| H  | +3.19041049 | -1.15620522 | +0.65855292 |
| H  | +2.89890272 | -1.65163864 | -1.00882947 |

15  
(S1/S2\_pyramid)CI

|    |             |             |             |
|----|-------------|-------------|-------------|
| C  | -1.18891547 | +0.82786730 | +0.38125186 |
| N  | +0.06504003 | +1.36746551 | +0.34354606 |
| C  | +1.22275853 | +0.62923049 | +0.21269997 |
| C  | +1.19574996 | -0.72954220 | +0.03548153 |
| C  | -0.11162795 | -1.39808391 | -0.03512550 |
| N  | -1.20363707 | -0.51523505 | +0.12600371 |
| C  | +2.44120239 | -1.56418903 | -0.11780612 |
| O  | -0.30165257 | -2.59389914 | -0.21487637 |
| Se | -2.43979836 | +1.89603992 | -1.01459478 |
| H  | +0.10571590 | +2.38201156 | +0.41298467 |
| H  | 2.15479121  | +1.19956974 | +0.26250929 |
| H  | -2.12562029 | -0.95104039 | +0.06880587 |
| H  | +3.09187075 | -1.48174726 | +0.76845614 |
| H  | +3.02492866 | -1.25649847 | -1.00118700 |
| H  | +2.15292930 | -2.61733409 | -0.24238035 |

15  
(T1/T2)CI

|    |             |             |             |
|----|-------------|-------------|-------------|
| C  | -1.20310092 | +0.86474880 | +0.17436161 |
| N  | +0.05614802 | +1.39591568 | +0.43037149 |
| C  | +1.21665098 | +0.67646357 | +0.16225480 |
| C  | +1.18511637 | -0.68330580 | +0.05393534 |
| C  | -0.09721497 | -1.35944034 | +0.33248439 |
| N  | -1.21491855 | -0.51069819 | +0.35122154 |
| C  | +2.36381919 | -1.54569854 | -0.29134368 |
| O  | -0.21195133 | -2.56207221 | +0.54266684 |
| Se | -2.14787194 | +1.54107467 | -1.47946904 |
| H  | +0.12007453 | +2.40578342 | +0.38959670 |
| H  | +2.13074046 | +1.28194127 | +0.07342740 |
| H  | -2.10728251 | -0.99564804 | +0.38735417 |
| H  | +2.41048569 | -1.74320103 | -1.37559719 |
| H  | +2.28267778 | -2.50952813 | +0.22981430 |
| H  | +3.30036224 | -1.06172013 | +0.00469031 |

15  
(S2\_boat/T2)ISC

|    |             |             |             |
|----|-------------|-------------|-------------|
| C  | -1.11872479 | +0.83912464 | -0.01666059 |
| N  | +0.08002648 | +1.39586150 | +0.13119161 |
| C  | +1.27736158 | +0.64385365 | +0.29338372 |
| C  | +1.19324147 | -0.76311092 | +0.03514737 |
| C  | -0.04905148 | -1.43578134 | -0.10637800 |
| N  | -1.21547085 | -0.50073275 | -0.04634504 |
| C  | +2.45190467 | -1.58531920 | -0.00360990 |
| O  | -0.33838600 | -2.62641945 | -0.28923854 |
| Se | -2.70303812 | +1.92253234 | -0.07609590 |
| H  | +0.10289244 | +2.40852187 | +0.22503357 |
| H  | +2.19107286 | +1.21930435 | +0.12085167 |
| H  | -2.12140320 | -0.92527547 | -0.24460132 |
| H  | +2.20110258 | -2.62902613 | -0.24325005 |
| H  | +2.97410444 | -1.56443921 | +0.97079073 |
| H  | +3.15810295 | -1.20447889 | -0.76445032 |

15

(S0/S1) CI

|    |             |             |             |
|----|-------------|-------------|-------------|
| C  | -1.27535093 | +0.83098481 | +0.50875643 |
| N  | +0.03645215 | +1.37851237 | +0.30321895 |
| C  | +1.17947282 | +0.63369077 | +0.18297685 |
| C  | +1.17815467 | -0.71936819 | +0.02181729 |
| C  | -0.13137559 | -1.39762283 | +0.04848304 |
| N  | -1.22706638 | -0.54028562 | +0.16548907 |
| C  | +2.42756680 | -1.54300916 | -0.15977683 |
| O  | -0.28691451 | -2.61175087 | -0.06213955 |
| Se | -2.17836523 | +1.90898643 | -1.30934063 |
| H  | +0.11739957 | +2.36910168 | +0.51273493 |
| H  | +2.10535431 | +1.21986524 | +0.17648372 |
| H  | -2.11058900 | -1.04121189 | +0.22784084 |
| H  | +2.19670547 | -2.44176918 | -0.75703347 |
| H  | +2.84077230 | -1.88725657 | 0.80967136  |
| H  | +3.21151858 | -0.96425197 | -0.68341300 |

15

(S1/T2) ISC

|    |             |             |             |
|----|-------------|-------------|-------------|
| C  | -1.19176884 | +0.89336104 | +0.24358017 |
| N  | +0.09560811 | +1.42728127 | +0.24267093 |
| C  | +1.23088775 | +0.66021808 | +0.11703288 |
| C  | +1.19238147 | -0.70343990 | -0.00160678 |
| C  | -0.11349266 | -1.37477124 | +0.08682847 |
| N  | -1.20312767 | -0.50687870 | +0.24235102 |
| C  | +2.41293425 | -1.56458165 | -0.15639075 |
| O  | -0.27783370 | -2.59125398 | +0.07242229 |
| Se | -2.50051445 | +1.67140110 | -1.03360562 |
| H  | +0.18555753 | +2.43665298 | +0.26951244 |
| H  | +2.17280689 | +1.21711480 | +0.12976917 |
| H  | -2.09847560 | -0.97588788 | +0.36878561 |
| H  | +2.48496513 | -2.29294428 | +0.66828173 |
| H  | +3.32961878 | -0.95379464 | -0.17287547 |
| H  | +2.36418804 | -2.14786200 | -1.09098714 |

15

(S0/T1) ISC

|    |             |             |             |
|----|-------------|-------------|-------------|
| C  | -1.30608013 | +0.83604045 | +0.34835704 |
| N  | +0.02619457 | +1.38431485 | +0.30976453 |
| C  | +1.17264912 | +0.65875338 | +0.10630608 |
| C  | +1.15939256 | -0.69228719 | -0.00028726 |
| C  | -0.13753571 | -1.40396877 | +0.13830287 |
| N  | -1.23559230 | -0.57553807 | +0.32644136 |
| C  | +2.39428849 | -1.52428513 | -0.19423614 |
| O  | -0.23901555 | -2.62811352 | +0.12689116 |
| Se | -1.92817824 | +1.82025560 | -1.33021815 |
| H  | +0.07383021 | +2.39433550 | +0.41557915 |
| H  | 2.10039977  | +1.24345116 | +0.04436284 |
| H  | -2.11725282 | -1.07437196 | +0.42755593 |
| H  | +2.33128177 | -2.10132560 | -1.12920825 |
| H  | +2.49810598 | -2.25536338 | +0.62127134 |
| H  | +3.29124733 | -0.88728234 | -0.22511351 |
